# Supplementary material
Source: publisher figshare collection journal article supplement (https://gsajournals.figshare.com/ndownloader/files/24982016)
Supplement: Supplementary file 1 [file 24982016]

## Sheet: in vitro minus Eco1 CID 
File S1A. Mass spectrometry detected post-translational modifications of Polη in vitro; - Eco1 (CID filter)
Peptide Sequence	Start	Stop	Modifications	Localization probability (%)	Ascore	Mascot:Score
AyEssLAcIAhIDmnAFFAqVEQmR	18	42	Y2 Acetyl_all, S4 Acetyl_all, S5 Acetyl_all, C8 Carbamidomethyl, H11 Acetyl_all, M14 Oxidation, N15 Deamidated, Q20 Deamidated, M24 Oxidation	100%, 100%, 100%, 100%, 100%, 100%, 100%, 100%, 100%	1,000.00, 1,000.00, 1,000.00, 1,000.00, 1,000.00, 1,000.00, 49.07, 34.53, 1,000.00	14.34
AyEssLAcIAhIDMnAFFAQVEQmR	18	42	Y2 Acetyl_all, S4 Acetyl_all, S5 Acetyl_all, C8 Carbamidomethyl, H11 Acetyl_all, N15 Deamidated, M24 Oxidation	100%, 100%, 100%, 100%, 100%, 99%, 100%	1,000.00, 1,000.00, 1,000.00, 1,000.00, 1,000.00, 20.78, 98.07	22.75
EDPVVcVqWnsIIAVSYAAR	48	67	C6 Carbamidomethyl, Q8 Deamidated, N10 Deamidated, S11 Acetyl_all	100%, 100%, 100%, 100%	1,000.00, 1,000.00, 1,000.00, 95.62	37.63
kYGISR	68	73	K1 Acetyl_all	0.96	14.02	23.17
mDTIQEALkK	74	83	M1 Oxidation, K9 Acetyl_all	100%, 96%	1,000.00, 14.02	53.38
kcSNLIPIHTAVFK	83	96	K1 Acetyl_all, C2 Carbamidomethyl	100%, 100%	29.27, 1,000.00	34.79
KGEDFWQYHDGcGSWVQDPAkQISVEDHK	97	125	C12 Carbamidomethyl, K21 Acetyl_all	100%, 100%	1,000.00, 59.61	33.83
KGEDFWQYHDGcGsWVQDPAK	97	117	C12 Carbamidomethyl, S14 Acetyl_all	100%, 100%	1,000.00, 75.31	48.32
kGEDFWQYHDGcGSWVQDPAK	97	117	K1 Acetyl_all, C12 Carbamidomethyl	100%, 100%	52.09, 1,000.00	51.2
KGEDFWqYHDGcGsWVqDPAK	97	117	Q7 Deamidated, C12 Carbamidomethyl, S14 Acetyl_all, Q17 Deamidated	100%, 100%, 98%, 100%	1,000.00, 1,000.00, 22.29, 1,000.00	11.01
QISVEDHkVSLEPYR	118	132	K8 Acetyl_all	0.99	27.16	32.39
QISVEDHkVSLEPYR	118	132	K8 Acetyl_all	0.99	23.1	55.91
KALkIFK	137	143	K4 Acetyl_all	1	61.77	52.96
ALkIFK	138	143	K3 Acetyl_all	1	91.37	35.94
IFkSAcDLVER	141	151	K3 Acetyl_all, C6 Carbamidomethyl	100%, 100%	23.10, 1,000.00	46.7
IFksAcDLVER	141	151	K3 Acetyl_all, S4 Acetyl_all, C6 Carbamidomethyl	100%, 100%, 100%	1,000.00, 1,000.00, 1,000.00	34.4
sAcDLVER	144	151	S1 Acetyl_all, C3 Carbamidomethyl	100%, 100%	1,000.00, 1,000.00	37.07
AsIDEVFLDLGR	152	163	S2 Acetyl_all	1	1000	77.78
DLITDWDDVILALGSQVckGIR	228	249	C18 Carbamidomethyl, K19 Acetyl_all	100%, 100%	1,000.00, 39.54	15.82
DLItDWDDVILALGSQVcK	228	246	T4 Acetyl_all, C18 Carbamidomethyl	100%, 100%	61.09, 1,000.00	28.11
DILGYTtScGLSSTK	254	268	T7 Acetyl_all, C9 Carbamidomethyl	97%, 100%	23.10, 1,000.00	71.62
LASNYkKPDAQTIVK	273	287	K6 Acetyl_all	0.99	27.96	37.46
kPDAQTIVK	279	287	K1 Acetyl_all	1	96.85	44.25
ELIDVLDLPHENSIkHIR	315	332	K15 Acetyl_all	0.98	20.41	57.69
ETWPDNAGQLkEFLDAK	333	349	K11 Acetyl_all	1	65.44	68.85
EFLDAkVK	344	351	K6 Acetyl_all	1	36.05	31.61
VkQSDYDR	350	357	K2 Acetyl_all	1	67.96	14.74
STSNIDPLkTADLAEK	358	373	K9 Acetyl_all	1	30.46	97.63
LFkLSR	374	379	K3 Acetyl_all	1	55.92	31.32
SmMSNkNLR	394	402	M2 Oxidation, K6 Acetyl_all	100%, 96%	40.00, 14.04	34.68
SmmSNkNLR	394	402	M2 Oxidation, M3 Oxidation, K6 Acetyl_all	100%, 100%, 96%	1,000.00, 1,000.00, 13.67	21.84
SmmSNkNLR	394	402	M2 Oxidation, M3 Oxidation, K6 Acetyl_all	100%, 100%, 100%	1,000.00, 1,000.00, 30.83	51.01
SmmSNkNLR	394	402	M2 Oxidation, M3 Oxidation, K6 Acetyl_all	100%, 100%, 100%	1,000.00, 1,000.00, 24.32	33.92
SMmSNkNLR	394	402	M3 Oxidation, K6 Acetyl_all	100%, 99%	17.01, 18.53	23.87
IQDLEQEYNkIVIPR	427	441	K10 Acetyl_all	1	36.05	50.62
IQDLEQEYNkIVIPR	427	441	K10 Acetyl_all	1	26.57	26.26
IQDLEQEYnkIVIPR	427	441	N9 Deamidated, K10 Acetyl_all	100%, 100%	43.32, 31.27	29.8
IQDLEQEYnkIVIPR	427	441	N9 Deamidated, K10 Acetyl_all	100%, 100%	78.06, 39.76	42.25
TVSISLkTK	442	450	K7 Acetyl_all	0.98	21.94	34.41
SGPVAYkGINFQSHELLK	458	475	K7 Acetyl_all	1	33.98	38.72
GINFQSHELLkVGIK	465	479	K11 Acetyl_all	1	26.36	38.41
GINFQSHELLkVGIK	465	479	K11 Acetyl_all	1	31.62	42.68
GINFQSHELLkVGIK	465	479	K11 Acetyl_all	1	63.14	46.66
VGIkFVTDLDIK	476	487	K4 Acetyl_all	1	62.26	52.72
VGIkFVTDLDIK	476	487	K4 Acetyl_all	1	77.24	39.93
FVTDLDIkGK	480	489	K8 Acetyl_all	0.99	32.56	52.26
NkSYYPLTK	490	498	K2 Acetyl_all	1	40	22.5
LsMTITNFDIIDLQK	499	513	S2 Acetyl_all	0.98	20.41	51.11
LsMTITNFDIIDLQK	499	513	S2 Acetyl_all	0.99	23.3	60.74
tVVDMFGnqVHTFK	514	527	T1 Acetyl_all, N8 Deamidated, Q9 Deamidated	100%, 100%, 100%	38.82, 1,000.00, 1,000.00	13.77
TPkLEccK	547	554	K3 Acetyl_all, C6 Carbamidomethyl, C7 Carbamidomethyl	100%, 100%, 100%	32.28, 1,000.00, 1,000.00	23.06
TPkLEccK	547	554	K3 Acetyl_all, C6 Carbamidomethyl, C7 Carbamidomethyl	100%, 100%, 100%	36.05, 1,000.00, 1,000.00	32.63
LEcckYQVTFTDQK	550	563	C3 Carbamidomethyl, C4 Carbamidomethyl, K5 Acetyl_all	100%, 100%, 100%	1,000.00, 1,000.00, 27.96	69.91
LSEGLNGAEESSkNLSFGEK	577	596	K13 Acetyl_all	0.99	25.66	34.39
LsEGLNGAEESSK	577	589	S2 Acetyl_all	1	179.67	65.25
NLSFGEkR	590	597	K7 Acetyl_all	1	46.21	20.5
QVTSSkNILSFFTR	617	630	K6 Acetyl_all	0.99	27.96	94.62

## Sheet: in vitro minus Eco1 HCD
File S1B. Mass spectrometry detected post-translational modifications of Polη in vitro; - Eco1 (HCD/ETD filter)
Peptide Sequence	Start	Stop	Modifications	Localization Probability	Ascore	Mascot:Score
kYGISR	68	73	K1 Acetyl_all	1	23.1	31.74
IFkSAcDLVER	141	151	K3 Acetyl_all, C6 Carbamidomethyl	100%, 100%	17.01, 1,000.00	52.01
SLkFEGDVFNPEGR	214	227	K3 Acetyl_all	0.97	7.71	39.67
kPDAQTIVK	279	287	K1 Acetyl_all	1	26.84	12.61
LFkLSR	374	379	K3 Acetyl_all	1	39.76	24.45
SmMSNkNLR	394	402	M2 Oxidation, K6 Acetyl_all	100%, 100%	40.00, 32.28	29.83
kSGPVAYK	457	464	K1 Acetyl_all	0.96	17.01	33.62
VGIkFVTDLDIK	476	487	K4 Acetyl_all	1	47.09	31.23
TPkLEccK	547	554	K3 Acetyl_all, C6 Carbamidomethyl, C7 Carbamidomethyl	96%, 100%, 100%	13.67, 1,000.00, 1,000.00	33.11
NLSFGEkR	590	597	K7 Acetyl_all	1	42.68	23.98

## Sheet: in vitro plus Eco1 CID
File S1C. Mass spectrometry detected post-translational modifications of Polη in vitro; + Eco1 (CID filter)
Peptide Sequence	Start	Stop	Modifications	Localization Probability	Ascore	Mascot:Score
FTWkELIQLGSPSK	4	17	K4 Acetyl_all	0.97	19.84	65.08
FTWkELIqLGSPSK	4	17	K4 Acetyl_all, Q8 Deamidated	100%, 100%	33.18, 1,000.00	47.28
ELIQLGSPSk	8	17	K10 Acetyl_all	0.98	17.01	42.73
AYESSLAcIAhIDMNAFFAQVEQmR	18	42	C8 Carbamidomethyl, H11 Acetyl_all, M24 Oxidation	100%, 8%, 100%	1,000.00, 0.00, 89.07	23.2
AYESSLAcIAhIDMnAFFAQVEQmR	18	42	C8 Carbamidomethyl, H11 Acetyl_all, N15 Deamidated, M24 Oxidation	100%, 30%, 99%, 100%	1,000.00, 0.83, 21.51, 52.79	22.92
EDPVVcVqWnsIIAVSYAAR	48	67	C6 Carbamidomethyl, Q8 Deamidated, N10 Deamidated, S11 Acetyl_all	100%, 100%, 100%, 100%	1,000.00, 1,000.00, 1,000.00, 90.87	42.08
kYGISR	68	73	K1 Acetyl_all	0.96	14.02	19.13
MDtIqEALKK	74	83	T3 Acetyl_all, Q5 Deamidated	100%, 100%	102.87, 1,000.00	18.3
kcSNLIPIHTAVFK	83	96	K1 Acetyl_all, C2 Carbamidomethyl	99%, 100%	25.77, 1,000.00	50.37
KGEDFWQYHDGcGsWVQDPAK	97	117	C12 Carbamidomethyl, S14 Acetyl_all	100%, 100%	1,000.00, 57.81	35.36
KGEDFWQYHDGcGSWVQDPAkQISVEDHK	97	125	C12 Carbamidomethyl, K21 Acetyl_all	100%, 100%	1,000.00, 34.08	34.09
kGEDFWQYHDGcGSWVqDPAK	97	117	K1 Acetyl_all, C12 Carbamidomethyl, Q17 Deamidated	96%, 100%, 0%	18.72, 1,000.00, 6.04	23.74
QISVEDHkVSLEPYR	118	132	K8 Acetyl_all	0.99	26.02	47.04
QISVEDHkVSLEPYR	118	132	K8 Acetyl_all	1	30.83	26.13
VsLEPYR	126	132	S2 Acetyl_all	1	49.79	15.76
kALkIFK	137	143	K1 Acetyl_all, K4 Acetyl_all	100%, 100%	151.71, 83.60	39.11
KALkIFK	137	143	K4 Acetyl_all	1	50.22	33.16
ALkIFK	138	143	K3 Acetyl_all	1	91.37	32.95
IFksAcDLVER	141	151	K3 Acetyl_all, S4 Acetyl_all, C6 Carbamidomethyl	100%, 100%, 100%	1,000.00, 1,000.00, 1,000.00	59.73
IFkSAcDLVER	141	151	K3 Acetyl_all, C6 Carbamidomethyl	100%, 100%	26.02, 1,000.00	56.33
sAcDLVER	144	151	S1 Acetyl_all, C3 Carbamidomethyl	100%, 100%	1,000.00, 1,000.00	45.05
AsIDEVFLDLGR	152	163	S2 Acetyl_all	1	1000	77.81
DLITDWDDVILALGSQVckGIR	228	249	C18 Carbamidomethyl, K19 Acetyl_all	100%, 100%	1,000.00, 58.99	58.8
DLItDWDDVILALGSQVcK	228	246	T4 Acetyl_all, C18 Carbamidomethyl	100%, 100%	50.85, 1,000.00	29.21
DLITDWDDVILALGSQVckGIR	228	249	C18 Carbamidomethyl, K19 Acetyl_all	100%, 98%	1,000.00, 17.00	15.09
DILGYTtScGLSSTK	254	268	T7 Acetyl_all, C9 Carbamidomethyl	96%, 100%	21.94, 1,000.00	79.09
DILGYTTscGLSSTK	254	268	S8 Acetyl_all, C9 Carbamidomethyl	96%, 100%	21.94, 1,000.00	66.36
NVckLASNYK	269	278	C3 Carbamidomethyl, K4 Acetyl_all	100%, 100%	1,000.00, 73.31	48.92
NVckLASnYK	269	278	C3 Carbamidomethyl, K4 Acetyl_all, N8 Deamidated	100%, 100%, 58%	1,000.00, 32.69, 23.70	28.55
LASNYkKPDAQTIVK	273	287	K6 Acetyl_all	0.99	27.96	49.11
LASNYkkPDAQTIVK	273	287	K6 Acetyl_all, K7 Acetyl_all	100%, 100%	33.98, 47.64	23.32
KPDAQTIVkNDcLLDFLDcGK	279	299	K9 Acetyl_all, C12 Carbamidomethyl, C19 Carbamidomethyl	100%, 100%, 100%	68.47, 1,000.00, 1,000.00	69.06
KPDAQTIVkNDcLLDFLDcGK	279	299	K9 Acetyl_all, C12 Carbamidomethyl, C19 Carbamidomethyl	100%, 100%, 100%	27.94, 1,000.00, 1,000.00	59.57
kPDAQTIVK	279	287	K1 Acetyl_all	1	103.33	49.12
ETWPDNAGQLkEFLDAK	333	349	K11 Acetyl_all	1	60.93	77.11
EFLDAkVK	344	351	K6 Acetyl_all	1	39.76	48.81
VkQSDYDR	350	357	K2 Acetyl_all	1	80	32.04
STSNIDPLkTADLAEK	358	373	K9 Acetyl_all	0.99	26.02	93.62
STsNIDPLK	358	366	S3 Acetyl_all	1	40	16.56
TADLAEkLFK	367	376	K7 Acetyl_all	1	53.53	48.55
LFkLSR	374	379	K3 Acetyl_all	1	55.92	29.84
SmmSNkNLR	394	402	M2 Oxidation, M3 Oxidation, K6 Acetyl_all	100%, 100%, 96%	1,000.00, 1,000.00, 14.04	53.52
SmmSNkNLR	394	402	M2 Oxidation, M3 Oxidation, K6 Acetyl_all	100%, 100%, 100%	1,000.00, 1,000.00, 28.86	49.48
SmmSNkNLR	394	402	M2 Oxidation, M3 Oxidation, K6 Acetyl_all	100%, 100%, 100%	1,000.00, 1,000.00, 30.83	49.42
SmmSNkNLR	394	402	M2 Oxidation, M3 Oxidation, K6 Acetyl_all	100%, 100%, 95%	1,000.00, 1,000.00, 12.81	48.32
SmMSNkNLR	394	402	M2 Oxidation, K6 Acetyl_all	100%, 99%	40.00, 22.85	42.66
SMmSNkNLR	394	402	M3 Oxidation, K6 Acetyl_all	100%, 98%	33.98, 17.01	32.01
SmmSNkNLR	394	402	M2 Oxidation, M3 Oxidation, K6 Acetyl_all	100%, 100%, 96%	1,000.00, 1,000.00, 14.04	25.15
SmmSNkNLR	394	402	M2 Oxidation, M3 Oxidation, K6 Acetyl_all	100%, 100%, 96%	1,000.00, 1,000.00, 14.04	23.61
SmMsnknLR	394	402	M2 Oxidation, S4 Acetyl_all, N5 Deamidated, K6 Acetyl_all, N7 Deamidated	100%, 100%, 100%, 100%, 100%	40.00, 30.09, 1,000.00, 23.48, 1,000.00	14.18
IQDLEQEYNkIVIPR	427	441	K10 Acetyl_all	1	52.04	52.1
IQDLEQEYNkIVIPR	427	441	K10 Acetyl_all	1	48.12	30.57
IQDLEQEYnkIVIPR	427	441	N9 Deamidated, K10 Acetyl_all	100%, 100%	57.45, 33.18	29.99
IQDLEQEYnkIVIPR	427	441	N9 Deamidated, K10 Acetyl_all	100%, 100%	35.37, 31.27	28.23
TVSISLkTK	442	450	K7 Acetyl_all	0.99	26.02	40.9
SGPVAYkGINFQSHELLK	458	475	K7 Acetyl_all	0.99	26.02	40.04
SGPVAYkGINFQSHELLK	458	475	K7 Acetyl_all	0.98	22.85	20.63
GINFQSHELLkVGIK	465	479	K11 Acetyl_all	1	83.03	55.92
GINFQSHELLkVGIK	465	479	K11 Acetyl_all	0.98	20.28	34.26
VGIkFVTDLDIK	476	487	K4 Acetyl_all	1	92.25	62.58
VGIkFVTDLDIK	476	487	K4 Acetyl_all	1	62.26	32.57
FVTDLDIkGK	480	489	K8 Acetyl_all	1	32.56	54.62
NkSYYPLTK	490	498	K2 Acetyl_all	1	40	28.69
SYYPLTkLSmTITNFDIIDLQK	492	513	K7 Acetyl_all, M10 Oxidation	97%, 100%	24.32, 1,000.00	36.45
LsMTITNFDIIDLQK	499	513	S2 Acetyl_all	0.99	21.4	61.24
SSAGkEDEEkTTSSK	528	542	K5 Acetyl_all, K10 Acetyl_all	89%, 99%	16.66, 26.02	42.61
TTSSkADEkTPK	538	549	K5 Acetyl_all, K9 Acetyl_all	91%, 100%	17.01, 30.46	40.05
TPkLEccK	547	554	K3 Acetyl_all, C6 Carbamidomethyl, C7 Carbamidomethyl	100%, 100%, 100%	28.86, 1,000.00, 1,000.00	31.67
LEcckYQVTFTDQK	550	563	C3 Carbamidomethyl, C4 Carbamidomethyl, K5 Acetyl_all	100%, 100%, 100%	1,000.00, 1,000.00, 30.46	86.99
LEcckYQVTFTDQK	550	563	C3 Carbamidomethyl, C4 Carbamidomethyl, K5 Acetyl_all	100%, 100%, 96%	1,000.00, 1,000.00, 18.53	41.08
LSEGLNGAEESSkNLSFGEK	577	596	K13 Acetyl_all	0.98	23.1	79.18
LsEGLNGAEESSK	577	589	S2 Acetyl_all	1	202.16	65.76
LSEGLNGAEESSkNLSFGEK	577	596	K13 Acetyl_all	1	30.83	33.07
NLSFGEkR	590	597	K7 Acetyl_all	1	52.86	20.18
QVTSSkNILSFFTR	617	630	K6 Acetyl_all	0.99	24.44	81.55

## Sheet: in vitro plus Eco1 HCD
File S1D. Mass spectrometry detected post-translational modifications of Polη in vitro; + Eco1 (HCD/ETD filter)
Peptide Sequence	Start	Stop	Modifications	Localization Probability	Ascore	Mascot:Score
kYGISR	68	73	K1 Acetyl_all	0.99	21.94	35.82
sAcDLVER	144	151	S1 Acetyl_all, C3 Carbamidomethyl	100%, 100%	1,000.00, 1,000.00	72.53
kPDAQTIVK	279	287	K1 Acetyl_all	1	64.6	26.38
VkQSDYDR	350	357	K2 Acetyl_all	1	39.76	39.79
LFkLSR	374	379	K3 Acetyl_all	1	45.01	29.4
SmmSNkNLR	394	402	M2 Oxidation, M3 Oxidation, K6 Acetyl_all	100%, 100%, 100%	1,000.00, 1,000.00, 32.28	42.6
TPkLEccK	547	554	K3 Acetyl_all, C6 Carbamidomethyl, C7 Carbamidomethyl	96%, 100%, 100%	14.04, 1,000.00, 1,000.00	30.03
kRPNSQHTATPQkK	603	616	K1 Acetyl_all, K13 Acetyl_all	95%, 63%	17.39, 8.22	13.27
